# Supplementary material for: Mortality in patients with heart failure and suicidal ideation discharged to skilled nursing facilities
Source: PubMed Central journal article supplement — J Geriatr Cardiol. 2022 Mar 28;19(3):198–208. doi: 10.11909/j.issn.1671-5411.2022.03.009 (PMC9002080; doi:10.11909/j.issn.1671-5411.2022.03.009), 2022-03-28
Supplement: jgc-19-3-198-S1.pdf [file jgc-19-3-198-S1.pdf]

**Table S1 ICD Codes used to capture key medical and psychiatric diagnoses.**

| <b>Diagnosis</b> | <b>Codes</b>                                                                                                                                                                                                                                                                                                                                                                                                                                                                                  |
|------------------|-----------------------------------------------------------------------------------------------------------------------------------------------------------------------------------------------------------------------------------------------------------------------------------------------------------------------------------------------------------------------------------------------------------------------------------------------------------------------------------------------|
| Psychosis        | 2938,295,29604,29614,29644,29654,297,298, F20,F22,F23,F24,F25,F28,F29,F302,F312,F315                                                                                                                                                                                                                                                                                                                                                                                                          |
| Dementia         | A81.00, A81.01, A81.09,A81.2, A81.82, A81.89, A81.9, F01.50, F01.51, F02.80, F02.81, F03.90, F03.91, F10.27, F10.97, F13.27, F13.97, F18.17, F18.27, F18.97, F19.17, F19.27, F19.97, G23.1, G30.0, G30.1, G30.8, G30.9, G31.01, G31.09, G31.83, G90.3, 046.11, 046.19, 046.3, 046.71, 046.79, 046.9, 290.0, 290.10, 290.11, 290.12, 290.13, 290.20, 290.21, 290.3, 290.40, 290.41, 290.42, 290.43, 291.1, 291.2, 292.82, 294.1, 294.10, 294.11, 294.20, 294.21, 331.0, 331.11, 331.19, 331.82 |
| Heart Failure    | 402.01, 402.11, 402.91, 404.01, 404.03, 404.11, 404.13, 404.91, 404.93, 428.0, 428.1, 428.20, 428.21, 428.22, 428.23, 428.30, 428.31, 428.32, 428.33, 428.40, 428.41, 428.42, 428.43, and 428.9., I50, I50.1, I50.20, I50.21, I50.22, I50.23, I50.30, I50.31, I50.32, I50.33, I50.40, I50.41, I50.42, I50.43, I50.9                                                                                                                                                                           |
